# Supplementary material for: GAP43-dependent mitochondria transfer from astrocytes enhances glioblastoma tumorigenicity
Source: PubMed Central journal article supplement (PMC10212766; doi:10.1038/s43018-023-00556-5), 2023-05-11
Supplement: 43018_2023_556_MOESM1_ESM.pdf [file 43018_2023_556_MOESM1_ESM.pdf]

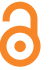

---

# **GAP43-dependent mitochondria transfer from astrocytes enhances glioblastoma tumorigenicity**

---

In the format provided by the authors and unedited

---

## Table of Contents

|                                             |   |
|---------------------------------------------|---|
| Supplementary Note .....                    | 3 |
| Supplementary Fig. 1. Gating strategy ..... | 4 |

## Supplementary Note

### GL261 model

- (1) Define GL261 objects:
  - a. Channel 3 (GFP) threshold
    - i. intensities: 11-185
    - ii. Minimum object size = 10000 cubic microns
  - b. Fill holes in objects
  - c. Separate touching objects
    - i. Object size guide = 1200 cubic microns
- (2) Define mitochondria objects
  - a. Channel 1 (mito::mKate2) threshold
    - i. Intensities 20-255
    - ii. Minimum object size = 1 cubic micron
  - b. Separate touching objects
    - i. Object size guide = 25 cubic microns
  - c. Filter population
    - i. Volume  $\geq$  0.1 cubic microns
- (3) Compartmentalize mitochondria objects inside GL261 objects

### SB28 model

- (1) Define SB28 objects:
  - a. Channel 3 (GFP) threshold
    - i. intensities: 20-255
    - ii. Minimum object size = 10000 cubic microns
  - b. Fill holes in objects
  - c. Separate touching objects
    - i. Object size guide = 1200 cubic microns
  - d. Filter population
    - i. Volume  $>$  600 cubic microns
- (2) Define mitochondria objects
  - a. Channel 1 (mito::mKate2) threshold
    - i. Intensities 20-255
    - ii. Minimum object size = 1 cubic micron
  - b. Separate touching objects
    - i. Object size guide = 25 cubic microns
  - c. Filter population
    - i. Volume  $\geq$  0.1 cubic microns
- (3) Compartmentalize mitochondria objects inside SB28 objects

### *In-vitro* gating strategy

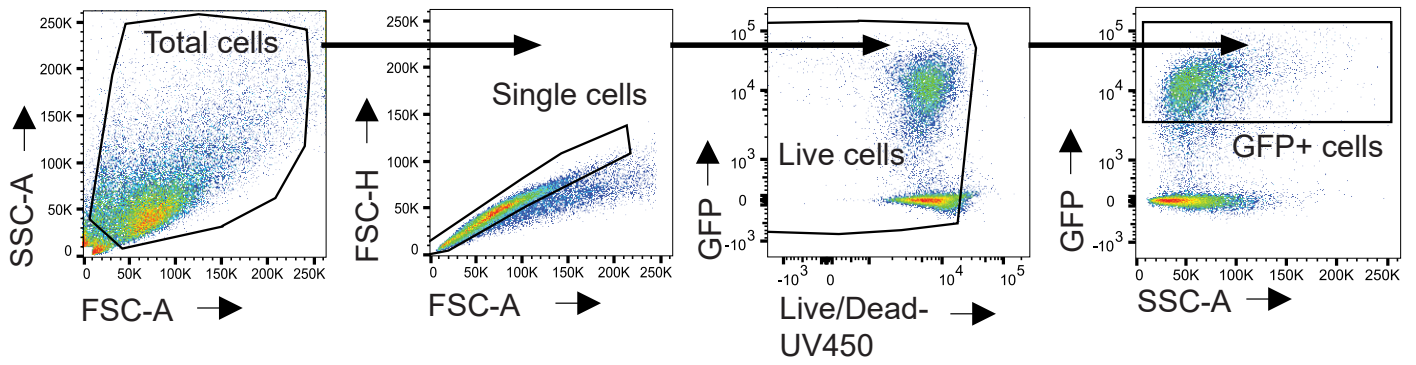

### *In-vivo* gating strategy

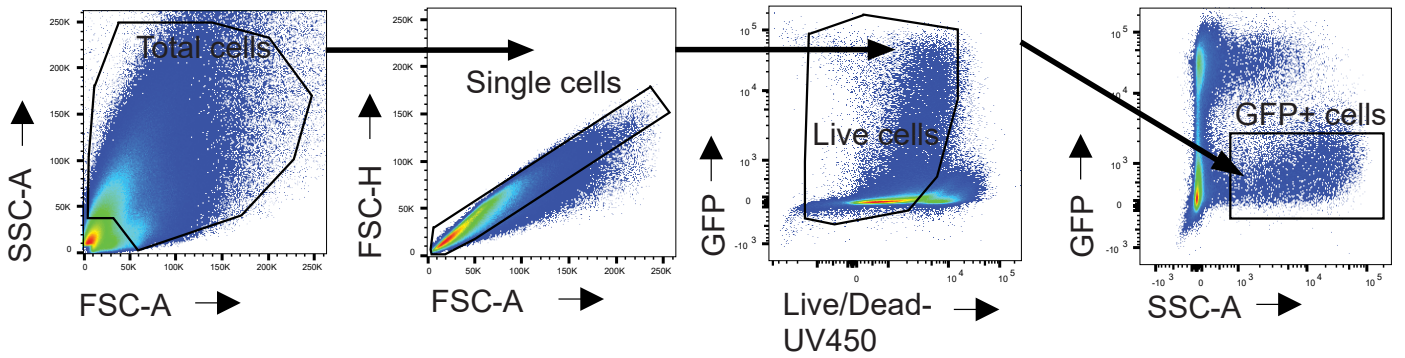

### Supplementary Fig. 1. Gating strategy

Flow cytometry gating strategy used for *in vitro* and *in vivo* experiments.
