# Supplementary material for: GAP43-dependent mitochondria transfer from astrocytes enhances glioblastoma tumorigenicity
Source: PubMed Central journal article supplement (PMC10212766; doi:10.1038/s43018-023-00556-5), 2023-05-11
Supplement: 43018_2023_556_MOESM18_ESM.pdf [file 43018_2023_556_MOESM18_ESM.pdf]

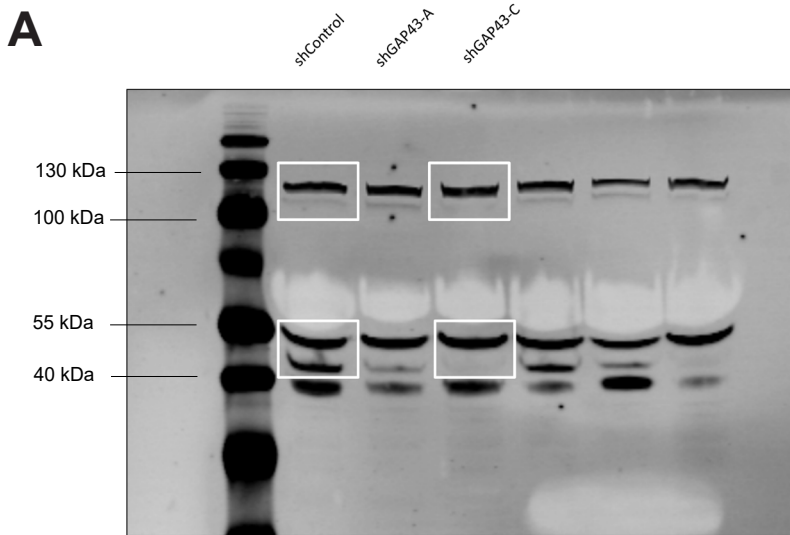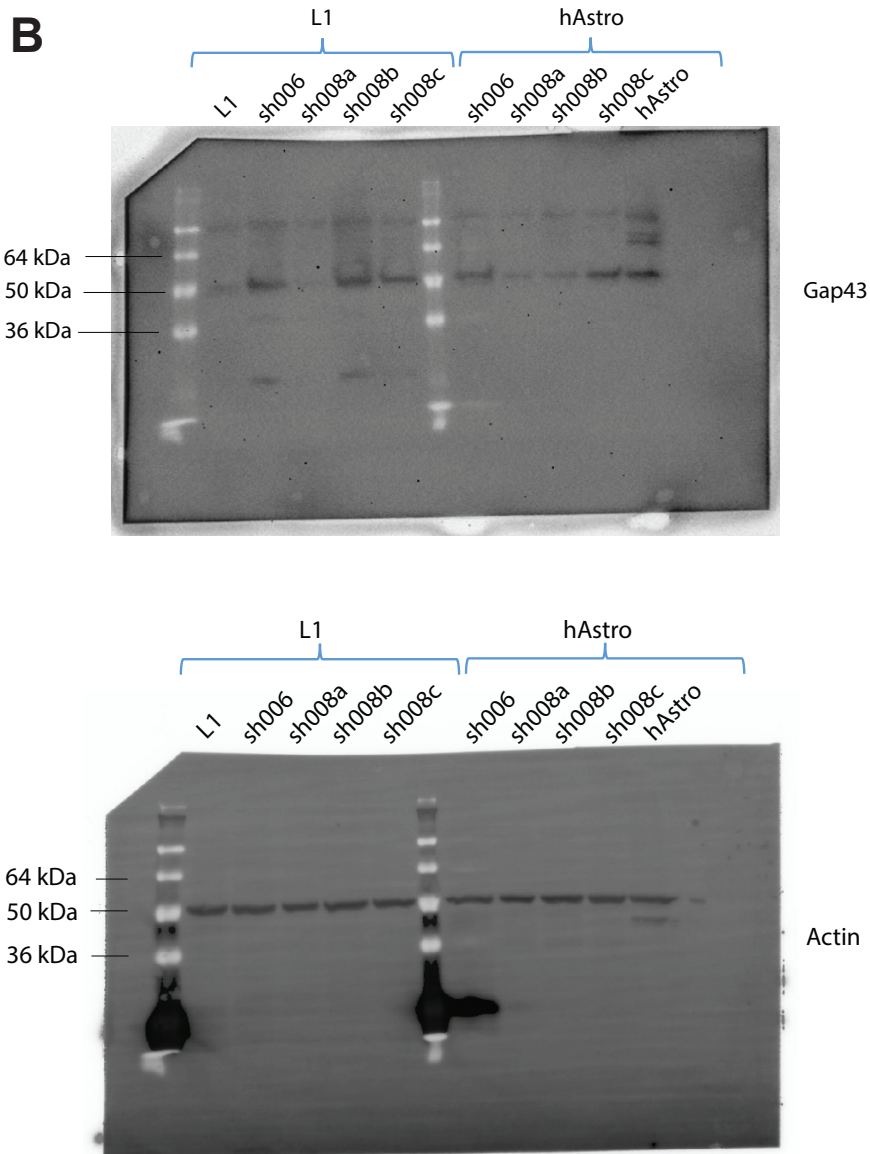

**Source Data for Extended Data Fig. 6I-J**

(A) Uncropped blot summarized in Extended Data Fig. 6I. (B) Uncropped blot summarized in Extended Data Fig. 6J.
