# Supplementary material for: GAP43-dependent mitochondria transfer from astrocytes enhances glioblastoma tumorigenicity
Source: PubMed Central journal article supplement (PMC10212766; doi:10.1038/s43018-023-00556-5), 2023-05-11
Supplement: 43018_2023_556_MOESM23_ESM.pdf [file 43018_2023_556_MOESM23_ESM.pdf]

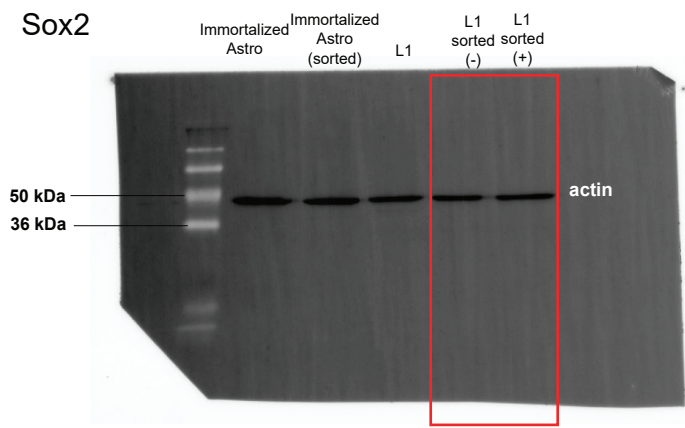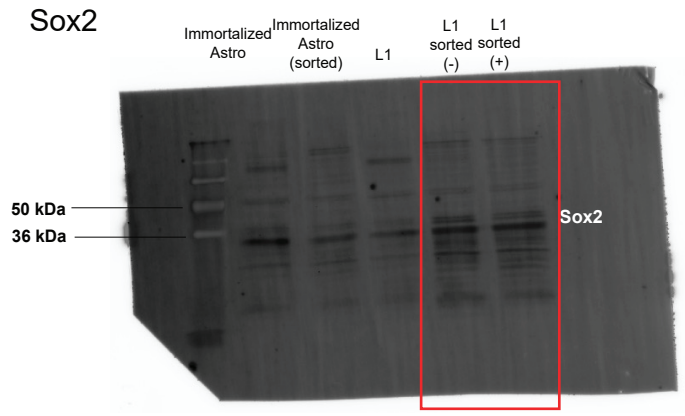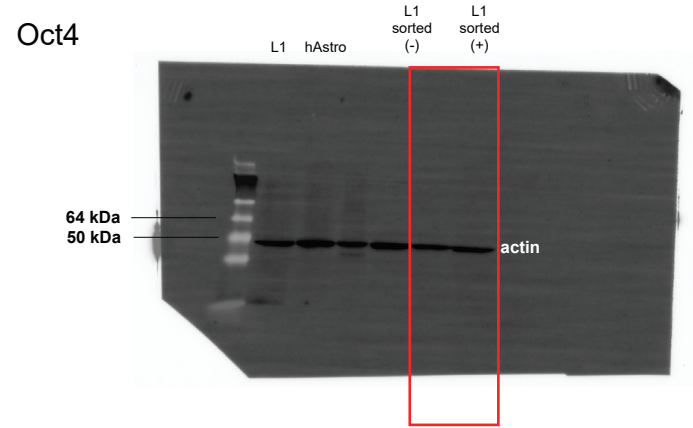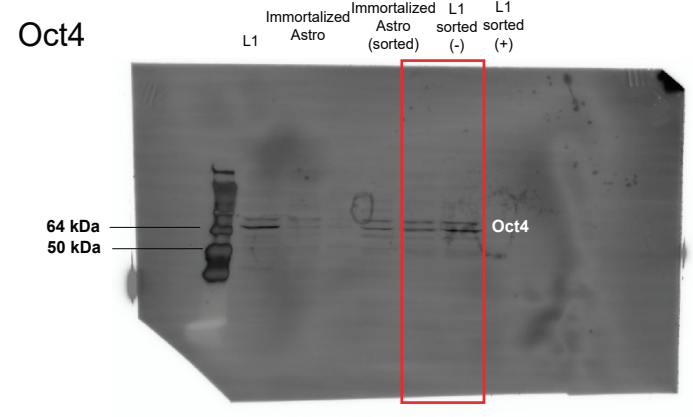

**Source Data for Extended Data Fig. 10B**

Uncropped Western blots for Sox2 (left) and Oct4 (right), including corresponding loading control blots (actin). Red box highlights the lanes relevant to the corresponding Extended Data figure.
